# Supplementary material for: Evaluating Antiplasmodial and Antimalarial Activities of Soybean (Glycine max) Seed Extracts on P. falciparum Parasite Cultures and P. berghei-Infected Mice
Source: Hindawi journal article supplement (doi:10.1155/2020/7605730), 2020-02-18

# Photomicrographs of Giemsa stained blood smears demonstrating parasite manifestation and clearance

Plasmodium infected mice and normal mice

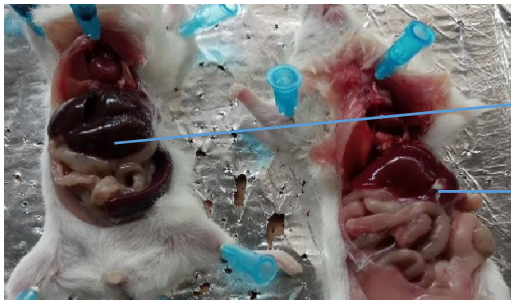

*Infected plasmodium liver*

Normal liver

Parasitemia in donor mouse

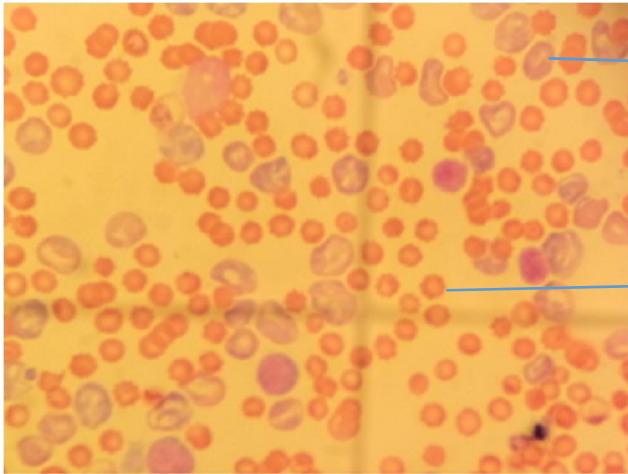

*Infected red blood cells*

*Normal red blood cells*

*Parasite exposure to peptide extract in mice*

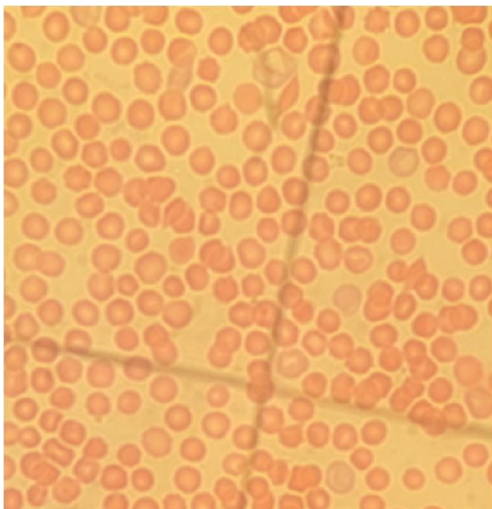

*\*Parasite exposure to methanol extract in mice*

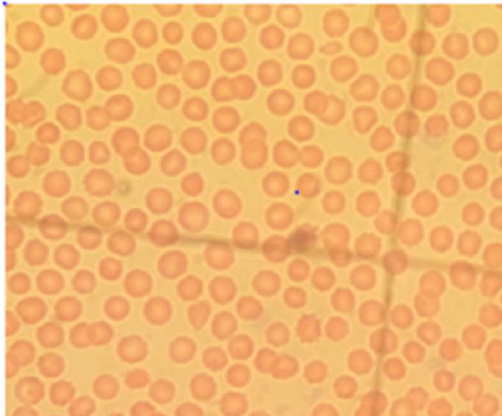

*\*Parasite exposure to CQ in mice*

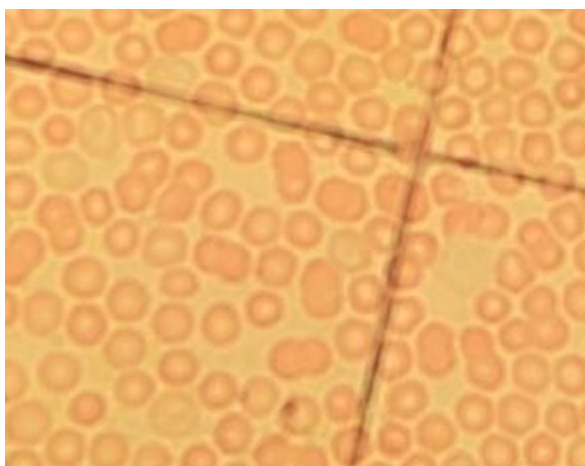

*\*W2 strain Parasite manifestation after culturing in vitro*

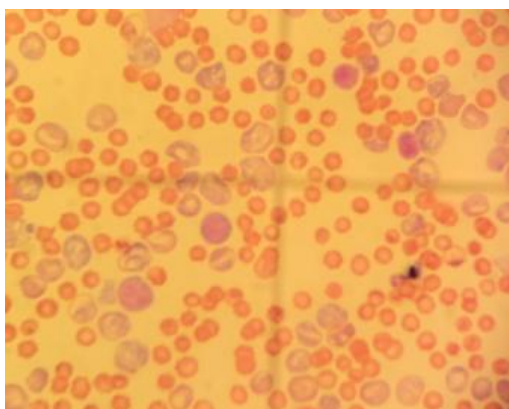

*\*D6 strain Parasite manifestation after culturing in vitro*

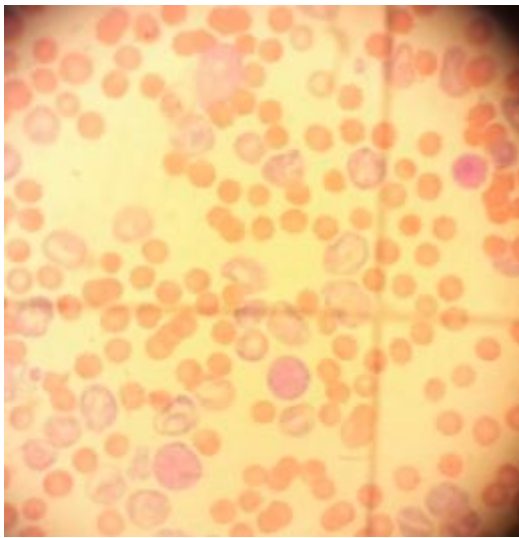

*\* W2 Parasite inhibition after treatment in vitro*

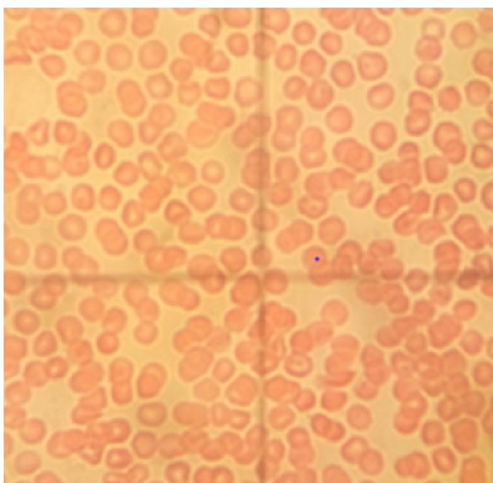

\* D6 Parasite inhibition after treatment *in vitro*

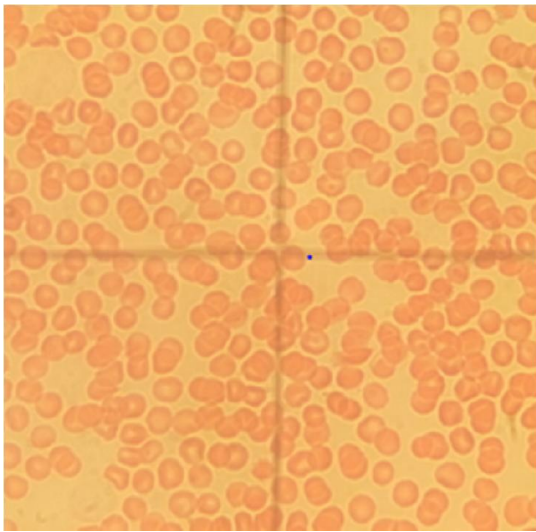

Supplement: f1 [file 7605730.f1.pdf]
